# Supplementary material for: Crew Autonomy During Simulated Medical Event Management on Long Duration Space Exploration Missions
Source: PubMed Central journal article supplement — Hum Factors. 2022 Apr 16;65(6):1221–34. doi: 10.1177/00187208211067575 (PMC10466940; doi:10.1177/00187208211067575), 2022-04-16
Supplement: sj-pdf-1-hfs-10.1177_00187208211067575.pdf [file sj-pdf-1-hfs-10.1177_00187208211067575.pdf]

## Scenario A: Pneumothorax

Condition: **Mission Control**

**4:30 – MC Calls**

| Trigger                                                                                                        | Patient vitals | Patient cues/actions                                                                                                                                                                                                                                                                                             | Expected participant actions                                                                                                               | Facilitator notes                                                                                                                                         | Mission Control Notes |
|----------------------------------------------------------------------------------------------------------------|----------------|------------------------------------------------------------------------------------------------------------------------------------------------------------------------------------------------------------------------------------------------------------------------------------------------------------------|--------------------------------------------------------------------------------------------------------------------------------------------|-----------------------------------------------------------------------------------------------------------------------------------------------------------|-----------------------|
| <p><b>Single participant</b> enters simulator to find patient complaining of pain and difficulty breathing</p> | None           | <p><b>Complaints:</b> difficulty breathing, pain on left side of chest.</p> <p><b>Script:</b> If asked, patient provides basic information about hitting chest on door handle while re-entering module. <b>After 2 minutes</b>, if help has not been called, prompt participant to get others into the room.</p> | <p>Questions patient to determine problem</p> <p>Calls for help from other participants via Walkie Talkie (waiting in conference room)</p> | <p>If participant doesn't call for help, wait <b>2 minutes</b>, then send in remaining participants send other participants in <b>1 minute later</b>.</p> |                       |
| <p>All participants enter simulator</p>                                                                        | None           | <p><b>Complaints:</b> difficulty breathing, pain on right side of chest.</p> <p><b>Script:</b> If asked, patient provides basic information about hitting chest on door handle while re-entering module. <b>After 2 minutes</b>, if participants do not ask question about injury, begins telling story.</p>     | <p>Questions patient to determine cause, location and type of injury.</p> <p>Refer to checklist to begin diagnostic algorithm.</p>         | <p><b>After 2 minutes</b>, prompt patient to provide information to continue conversation and treatment.</p>                                              |                       |

|                                                                                  |                                                                  |                                                                                                                                                                                                                                                                                                   |                                                                                                                                                                                                                                                      |                                                                                                                                                                                                                                                                          |                                                                                                                                   |
|----------------------------------------------------------------------------------|------------------------------------------------------------------|---------------------------------------------------------------------------------------------------------------------------------------------------------------------------------------------------------------------------------------------------------------------------------------------------|------------------------------------------------------------------------------------------------------------------------------------------------------------------------------------------------------------------------------------------------------|--------------------------------------------------------------------------------------------------------------------------------------------------------------------------------------------------------------------------------------------------------------------------|-----------------------------------------------------------------------------------------------------------------------------------|
| <p><b>After 3 minutes</b> of not moving forward with diagnosis or treatment.</p> | <p>Pulse: 134<br/>RR: 44<br/>SPO2: 79</p>                        | <p><b>“I can’t breathe”; “It’s getting worse”; “You have to do something”<br/>“Please contact MC”</b></p>                                                                                                                                                                                         | <p>Initiate call to MC</p>                                                                                                                                                                                                                           | <p>Prompt patient to ask participants to call mission control</p>                                                                                                                                                                                                        |                                                                                                                                   |
| <p>MC/FS called</p>                                                              | <p>If put on monitor:<br/>Pulse: 116<br/>RR: 30<br/>SPO2: 88</p> | <p><b>Complaints:</b> Increasing difficulty breathing.<br/><br/><b>Actions:</b> Becomes slower to respond to questions; labored breathing.<br/><br/><b>Script:</b> Answers questions as asked to guide participants through the algorithm.</p>                                                    | <p>Participants ask for flight surgeon assistance and follow directions<br/><br/>Unstow equipment according to checklist and instructions</p>                                                                                                        |                                                                                                                                                                                                                                                                          | <p>Collect information from participants in order to provide diagnosis. Request cause of injury, SPO2, RR, patient complains.</p> |
| <p>If using checklist or otherwise moving forward without flight surgeon.</p>    | <p>If put on monitor:<br/>Pulse: 116<br/>RR: 30<br/>SPO2: 88</p> | <p><b>Complaints:</b> Increasing difficulty breathing.<br/><br/><b>Actions:</b> Becomes slower to respond to questions; labored breathing.<br/><br/><b>Script:</b> Answers questions as asked to guide participants through the algorithm. Ask again for participants to call flight surgeon.</p> | <p>Identify chest injury as correct algorithm and evaluate patient for breathing and respiratory distress<br/><br/>Continue to pneumothorax pathway<br/><br/>Unstow equipment and continue using algorithm to guide insertion of needle catheter</p> | <p>Prompts patient as necessary to help with exam.<br/><br/>If the flight surgeon is not contacted, patient can be prompted to suggest calling after <b>3 minutes</b>.<br/><br/>After <b>1.5 minutes</b>, may prompt MC to call into the module to ask about status.</p> | <p>If calling in, request an update as the monitors at MC indicate the patient may be in distress.</p>                            |

|                                         |                                  |                                                                                                                                                                                        |                                                                                                                                     |                                                                         |                                                                                                                      |
|-----------------------------------------|----------------------------------|----------------------------------------------------------------------------------------------------------------------------------------------------------------------------------------|-------------------------------------------------------------------------------------------------------------------------------------|-------------------------------------------------------------------------|----------------------------------------------------------------------------------------------------------------------|
| Contacts flight surgeon                 | Pulse: 116<br>RR: 30<br>SPO2: 88 | <b>Complaints:</b> Increasing difficulty breathing.<br><br><b>Actions:</b> Becomes slower to respond to questions; labored breathing.<br><br><b>Script:</b> Answers questions as asked | Follows directions from flight surgeon to evaluate patient<br><br>Unstow required equipment<br><br>Prepare for needle decompression |                                                                         | Flight surgeon guides participants through the checklist step-by-step. Asks for clarifying information as necessary. |
| Inserts needle in incorrect side        | Pulse: 116<br>RR: 30<br>SPO2: 88 | <b>Action:</b> Patient does not recover.                                                                                                                                               | Inserts needle on right side of patient instead of left.<br><br>Discusses amongst team for other options. Identify correct side     |                                                                         | Asks participants if they are sure about the side of the injury; redirects to other side.                            |
| Inserts needle catheter on correct side | Pulse: 105<br>RR:23<br>SPO2: 96  | <b>Actions:</b> Coughs and slowly begins easier breathing.                                                                                                                             | Participants continue with direction from FS to adhere drain to chest.                                                              | Once participants are through and discussing next steps, scenario ends. | Flight surgeon will prompt participants with follow-up information.                                                  |

## Scenario A: Pneumothorax

Condition: **No Mission Control**

| Trigger | Patient vitals | Patient cues/actions | Expected participant actions | Facilitator notes | Mission Control Notes |
|---------|----------------|----------------------|------------------------------|-------------------|-----------------------|
|---------|----------------|----------------------|------------------------------|-------------------|-----------------------|

|                                                                                                                                 |             |                                                                                                                                                                                                                                                                                                                   |                                                                                                                                            |                                                                                                                                 |  |
|---------------------------------------------------------------------------------------------------------------------------------|-------------|-------------------------------------------------------------------------------------------------------------------------------------------------------------------------------------------------------------------------------------------------------------------------------------------------------------------|--------------------------------------------------------------------------------------------------------------------------------------------|---------------------------------------------------------------------------------------------------------------------------------|--|
| <p><u>Single participant (drawn from hat)</u> enters simulator to find patient complaining of pain and difficulty breathing</p> | <p>None</p> | <p><b>Complaints:</b> difficulty breathing, pain on right side of chest.</p> <p><b>Script:</b> If asked, patient provides basic information about hitting chest on door handle while re-entering module. <u>After 2 minutes</u>, if help has not been called, prompt participant to get others into the room.</p> | <p>Questions patient to determine problem</p> <p>Calls for help from other participants via Walkie Talkie (waiting in conference room)</p> | <p>If participant doesn't call for help after prompt at <u>2 minutes</u>, send other participants in <u>1 minute later</u>.</p> |  |
| <p>All participants enter simulator</p>                                                                                         | <p>None</p> | <p><b>Complaints:</b> difficulty breathing, pain on right side of chest.</p> <p><b>Script:</b> If asked, patient provides basic information about hitting chest on door handle while re-entering module. <u>After 2 minutes</u>, if participants do not ask question about injury,</p>                            | <p>Questions patient to determine cause, location and type of injury.</p> <p>Refer to checklist to begin diagnostic algorithm.</p>         | <p><u>After 2 minutes</u>, prompt patient to provide information to continue conversation and treatment.</p>                    |  |

|                                                                           |                                                                           |                                                                                                                                                                                                                                            |                                                                                                                                                                                                                                                  |                                                      |  |
|---------------------------------------------------------------------------|---------------------------------------------------------------------------|--------------------------------------------------------------------------------------------------------------------------------------------------------------------------------------------------------------------------------------------|--------------------------------------------------------------------------------------------------------------------------------------------------------------------------------------------------------------------------------------------------|------------------------------------------------------|--|
|                                                                           |                                                                           | begins telling story.                                                                                                                                                                                                                      |                                                                                                                                                                                                                                                  |                                                      |  |
| <b>After 3 minutes</b> of not moving forward with diagnosis or treatment. | None                                                                      | <p><b>Complaints:</b> Increasingly complain of pain and difficulty breathing.</p> <p><b>Script:</b> Requests assistance (“someone do something”) and prompts participants to use of checklist.</p>                                         | Retrieve checklist and begin diagnostic process.                                                                                                                                                                                                 | Prompt patient to provide information on checklists. |  |
| If using checklist or otherwise moving forward.                           | <p>If put on monitor:</p> <p>Pulse: 116</p> <p>RR: 30</p> <p>SPO2: 88</p> | <p><b>Complaints:</b> Increasing difficulty breathing.</p> <p><b>Actions:</b> Becomes slower to respond to questions; labored breathing.</p> <p><b>Script:</b> Answers questions as asked to guide participants through the algorithm.</p> | <p>Identify chest injury as correct algorithm and evaluate patient for breathing and respiratory distress</p> <p>Continue to pneumothorax pathway</p> <p>Unstow equipment and continue using algorithm to guide insertion of needle catheter</p> | Prompts patient as necessary to assist with exam.    |  |

## Scenario C: Smoke Inhalation

Condition: **No Mission Control**

| Trigger                                                                     | Patient vitals | Patient cues/actions                                                                                                                                                               | Expected participant actions                                                                                                | Facilitator notes                                                                             | Mission Control Notes |
|-----------------------------------------------------------------------------|----------------|------------------------------------------------------------------------------------------------------------------------------------------------------------------------------------|-----------------------------------------------------------------------------------------------------------------------------|-----------------------------------------------------------------------------------------------|-----------------------|
| Participants called to medical bay by sick patient                          | None           | <p><b>Complaints:</b> difficulty breathing</p> <p><b>Actions:</b> Coughing and trouble breathing</p> <p><b>Script:</b> Provides information as requested on how smoke started.</p> | Questions patient to determine problem                                                                                      |                                                                                               |                       |
| <u>1 minute</u> after scenarios begins alarms and lights in simulator sound | None           | <p><b>Complaints:</b> difficulty breathing</p> <p><b>Actions:</b> Coughing and trouble breathing</p> <p><b>Script:</b> prompts participants to need to perform technical tasks</p> | <p>Divide responsibilities to care for patient and conquer technical task</p> <p>Deploy checklist for smoke inhalation.</p> | <u>After 1 minute</u> , prompt SS to start alarms and lights                                  |                       |
| <u>After 3 minutes</u> of not moving forward with diagnosis or treatment.   | None           | <p><b>Complaints:</b> Increasingly difficulty speaking and breathing</p> <p><b>Script:</b> Prompts participants to the checklist. If all participants focus on</p>                 | Deploy checklist                                                                                                            | Prompt patient to ask participants to perform medical and technical tasks, retrieve checklist |                       |

|                                                                     |                                                                                                                                             |                                                                                                                                          |                                                                                                                                                                 |                                                                                                                                                             |  |
|---------------------------------------------------------------------|---------------------------------------------------------------------------------------------------------------------------------------------|------------------------------------------------------------------------------------------------------------------------------------------|-----------------------------------------------------------------------------------------------------------------------------------------------------------------|-------------------------------------------------------------------------------------------------------------------------------------------------------------|--|
|                                                                     |                                                                                                                                             | technical task,<br>request help from<br>participants                                                                                     |                                                                                                                                                                 |                                                                                                                                                             |  |
| Patient care begins                                                 | <p><b>Before on O2:</b><br/>RR: 26</p> <p>SPO2: 91</p> <p>HR: 96</p> <p><b>After on O2:</b></p> <p>RR: 20</p> <p>SPO2: 98</p> <p>HR: 96</p> | <p><b>Complaints:</b><br/>Increasing difficulty<br/>breathing.</p> <p><b>Script:</b> As necessary,<br/>remind patients of<br/>tasks.</p> | <p>Place patient on O2<br/>per algorithm.</p> <p>Check vital signs</p>                                                                                          | <p>Prompt patient to<br/>remind participants<br/>to do tasks.</p> <p>Watch participant(s)<br/>performing technical<br/>task to look for<br/>completion.</p> |  |
| <u>After 6 minutes,</u><br>technical task unable<br>to be completed | Same as above<br>throughout                                                                                                                 | Continued as above                                                                                                                       | Continued as above                                                                                                                                              | Turn off lights and<br>alarms as “returned<br>to normal”                                                                                                    |  |
| Technical Task<br>completed, lights and<br>alarms turn off.         | Same as above<br>throughout                                                                                                                 | <b>Complaints:</b> Breathing<br>improves with oxygen                                                                                     | <p>Participants engaged<br/>in technical task<br/>return to assist with<br/>patient.</p> <p>Team forms a plan to<br/>care for patient and<br/>move forward.</p> |                                                                                                                                                             |  |

## Scenario C: Smoke Inhalation

Condition: **Mission Control**

**3:00 – MC Calls**

| Trigger                                                                     | Patient vitals | Patient cues/actions                                                                                                                                                                | Expected participant actions                                                                                                                                                           | Facilitator notes                                           | Mission Control Notes                                                                                                                                                          |
|-----------------------------------------------------------------------------|----------------|-------------------------------------------------------------------------------------------------------------------------------------------------------------------------------------|----------------------------------------------------------------------------------------------------------------------------------------------------------------------------------------|-------------------------------------------------------------|--------------------------------------------------------------------------------------------------------------------------------------------------------------------------------|
| Participants called to medical bay by sick patient                          | None           | <p><b>Complaints:</b> difficulty breathing</p> <p><b>Actions:</b> Coughing and trouble breathing</p> <p><b>Script:</b> Provides information as requested on how smoke started.</p>  | <p>Questions patient to determine problem</p> <p>Call Mission Control</p>                                                                                                              |                                                             |                                                                                                                                                                                |
| <b>1 minute</b> after scenarios begins alarms and lights in simulator sound | None           | <p><b>Complaints:</b> difficulty breathing</p> <p><b>Actions:</b> Coughing and trouble breathing</p> <p><b>Script:</b> prompts participants to need to perform technical tasks.</p> | <p>Divide responsibilities to care for patient and conquer technical task</p> <p>Discuss issues with mission control.</p> <p>Request assistance with patient and technical issues.</p> | <b>After 1 minute,</b> prompt SS to start alarms and lights | <p>Provide guidance on ongoing issues.</p> <p>Direct participant to divide into groups to handle the technical task and the patient.</p> <p>Give guidance on patient care.</p> |
| <b>After 2 minutes</b> of not moving forward with diagnosis or treatment.   | None           | <p><b>Complaints:</b> Increasingly difficulty speaking and breathing</p> <p><b>Script:</b> Prompts participants to call mission control</p>                                         | Call Mission Control                                                                                                                                                                   |                                                             | Prompt patient to ask participants to perform medical and technical tasks, retrieve checklist                                                                                  |



|                                                               |                                                                                                                                     |                                                        |                                                                                                                                      |                                                                                                                                  |                                                                                                                                                              |
|---------------------------------------------------------------|-------------------------------------------------------------------------------------------------------------------------------------|--------------------------------------------------------|--------------------------------------------------------------------------------------------------------------------------------------|----------------------------------------------------------------------------------------------------------------------------------|--------------------------------------------------------------------------------------------------------------------------------------------------------------|
| Patient care begins                                           | <b>Before on O2:</b><br>RR: 26<br><br>SPO2: 91<br><br>HR: 96<br><br><b>After on O2:</b><br><br>RR: 20<br><br>SPO2: 98<br><br>HR: 96 | <b>Complaints:</b><br>Increasing difficulty breathing. | Place patient on O2 per algorithm.<br><br>Check vital signs<br><br>Follow instructions from mission control.                         | Prompt patient to remind participants to do tasks.<br><br>Watch participant(s) performing technical task to look for completion. | Provide participants with assistance in developing the care plan, following the algorithm.<br><br>Remind participants that technical task is most important. |
| <b>After 6 minutes,</b> technical task unable to be completed | Same as above throughout                                                                                                            | Continued as above                                     | Continued as above                                                                                                                   | Turn off lights and alarms as “returned to normal”                                                                               |                                                                                                                                                              |
| Technical Task completed, lights and alarms turn off.         | Same as above throughout                                                                                                            | <b>Complaints:</b> Breathing improves with oxygen      | Participants engaged in technical task return to assist with patient.<br><br>Team forms a plan to care for patient and move forward. |                                                                                                                                  | Make a plan to call participants back to gather more information.                                                                                            |

## Scenario D: Cardiac Arrest

Condition: **No Mission Control**

| Trigger              | Patient vitals | Patient cues/actions | Expected participant actions | Facilitator notes | Mission Control Notes |
|----------------------|----------------|----------------------|------------------------------|-------------------|-----------------------|
| Participants witness | VF             | Not breathing,       | Assess patient for pulse     |                   |                       |

|                                                                                                    |                       |                                   |                                                                                               |                                                 |  |
|----------------------------------------------------------------------------------------------------|-----------------------|-----------------------------------|-----------------------------------------------------------------------------------------------|-------------------------------------------------|--|
| patient receiving electrical shock via computer video.<br><br>All enter the simulator              |                       | speaking or moving                | and breathing.<br><br>Start CPR<br><br>Deploy Checklist                                       |                                                 |  |
| Participants begin CPR                                                                             | VF                    | Not breathing, speaking or moving | Divide responsibilities to perform CPR and manage algorithm.<br><br>Retrieve AED from storage |                                                 |  |
| Apply AED pads to patient                                                                          | VF                    | Not breathing, speaking or moving | Turn on AED<br><br>Follow provided directions from MC and AED                                 |                                                 |  |
| After 2 shocks<br><u>Or</u><br>If AED is not used, after 4 rounds of CPR (approximately 8 minutes) | HR: 120<br><br>RR: 30 | Patient coughs and recovers       | Participants speak to patient and asks if ok.<br><br>Make a plan for continued care with MC   |                                                 |  |
| If no CPR or AED:<br>After 8 minutes scenario ends                                                 |                       |                                   |                                                                                               | After 8 minutes, end scenario for participants. |  |

## Scenario D: Cardiac Arrest

Condition: **Mission Control**

**3:00 – MC Calls**

| Trigger              | Patient vitals | Patient cues/actions | Expected participant actions | Facilitator notes | Mission Control Notes |
|----------------------|----------------|----------------------|------------------------------|-------------------|-----------------------|
| Participants witness | VF             | Not breathing,       | Assess patient for pulse and |                   |                       |

|                                                                                       |                       |                                   |                                                                                               |                                     |                                                                                                           |
|---------------------------------------------------------------------------------------|-----------------------|-----------------------------------|-----------------------------------------------------------------------------------------------|-------------------------------------|-----------------------------------------------------------------------------------------------------------|
| patient receiving electrical shock via computer video.<br><br>All enter the simulator |                       | speaking or moving                | breathing.<br><br>Start CPR<br><br>Call for Help                                              |                                     |                                                                                                           |
| Participants begin CPR                                                                | VF                    | Not breathing, speaking or moving | Divide responsibilities to perform CPR and manage algorithm.<br><br>Retrieve AED from storage |                                     | Walk participants through CPR algorithm and application of the AED.                                       |
| <b>After 3 minutes</b> , if participant have not called MC, FS calls into simulator.  | VF                    | Not breathing, speaking or moving | Participants answer call and provide update to flight surgeon                                 | Prompt call from MC after 3 minutes | Ask for status update due to issues seen on monitors at MC                                                |
| Apply AED pads to patient                                                             | VF                    | Not breathing, speaking or moving | Turn on AED<br><br>Follow provided directions from MC and AED                                 |                                     | Instruct participants to apply AED pads to the patient.                                                   |
| After 2 shocks                                                                        | HR: 120<br><br>RR: 30 | Patient coughs and recovers       | Participants speak to patient and asks if ok.<br><br>Make a plan for continued care with MC   |                                     | Make a plan with participant and respond that you will call back with further instructions in 10 minutes. |

## Scenario B: Penetrating Eye Injury

Condition: **No Mission Control**

| Trigger                               | Patient Vitals | Patient cues/actions           | Participant Actions                    | Facilitator Notes                          | Mission Control Notes |
|---------------------------------------|----------------|--------------------------------|----------------------------------------|--------------------------------------------|-----------------------|
| Small explosion in simulator seen via | NONE           | Falls back in shock, confused. | Participants enter simulator to assess | May need to provide prompts for patient to |                       |

|                                                              |  |                                                                                                                                                                                                  |                                                                                                                                              |                                                                                                                               |  |
|--------------------------------------------------------------|--|--------------------------------------------------------------------------------------------------------------------------------------------------------------------------------------------------|----------------------------------------------------------------------------------------------------------------------------------------------|-------------------------------------------------------------------------------------------------------------------------------|--|
| monitor                                                      |  | Begins to call for help and yell in pain                                                                                                                                                         | patient.<br>Ask for status updates.                                                                                                          | enter.                                                                                                                        |  |
| After 3 minutes                                              |  | <b>Complaints:</b> eye is in severe pain<br><br><b>Actions:</b> Cover both eyes with hands, refuses to allow participants to look at eyes.<br><br><b>Script:</b> Increasingly agitated and upset | Provide comfort to patient.<br><br>Ask to see eye.<br><br>Open checklist for eye injury-penetrating object                                   | If participants provide helpful comfort, patient may become calm and more cooperative.                                        |  |
| Checklist not deployed, and participants stuck for 3 minutes |  | Patient prompts participants to check the algorithm for care                                                                                                                                     | Participants get out checklist                                                                                                               | Prompt patient to discuss checklist.                                                                                          |  |
| Checklist deployed or participants proceeding with care      |  | Patient upset and asking about damage. Concerned about how they will continue mission.<br><br>If participants give comfort, patient responds.<br><br>If not, participant increasingly agitated   | Follow directions in the manual.<br><br>Retrieve appropriate equipment<br><br>Cover patient eyes<br><br>Make a plan for continued monitoring | Prompt patient with cues for level of agitation.<br><br>Once participants have calmed patient and made a plan, scenario ends. |  |

## Scenario B: Penetrating Eye Injury

Condition: **Mission Control**

**4:30 – MC Calls**

| Trigger                                                      | Patient Vitals | Patient cues/actions                                                                                                                                                                              | Participant Actions                                                                                   | Facilitator Notes                                                                                 | Mission Control Notes                                                                                                               |
|--------------------------------------------------------------|----------------|---------------------------------------------------------------------------------------------------------------------------------------------------------------------------------------------------|-------------------------------------------------------------------------------------------------------|---------------------------------------------------------------------------------------------------|-------------------------------------------------------------------------------------------------------------------------------------|
| Small explosion in simulator seen via monitor (pre-recorded) | NONE           | <b>Script:</b> Begins to call for help and yell in pain                                                                                                                                           | All participants enter simulator to assess patient.<br><br>Request updates from patient on condition. | Coax participants to enter simulator to care for patients.                                        | May need to provide prompts for patient to enter.                                                                                   |
| After 3 minutes                                              | NONE           | <b>Complaints:</b> eye is in severe pain<br><br><b>Actions:</b> Cover both eyes with hands, refuses to allow participants to look at eyes.<br><br><b>Script:</b> Increasingly agitated and upset. | Provide comfort to patient.<br><br>Ask to see eye(s)<br><br>Call for help from MC                     | If participants provide helpful comfort, patient may become calm and more cooperative.            |                                                                                                                                     |
| <u>After 3 minutes</u> of not calling for help               | NONE           | <b>Script:</b> Prompt participants to call the flight surgeon                                                                                                                                     | Participants call for help from MC.                                                                   | Prompt patient to discuss call for help                                                           | Request information on situation and patient condition.                                                                             |
| <u>After 1.5 minutes</u> of not calling for help             | NONE           |                                                                                                                                                                                                   |                                                                                                       | MC calls                                                                                          |                                                                                                                                     |
| MC called and participants proceeding with care.             |                | Patient upset and asking about damage. Concerned about how they will continue mission.                                                                                                            | Follow directions from MC<br><br>Retrieve appropriate equipment as requested by MC                    | Prompt patient with cues for level of agitation.<br><br>Once participants have calmed patient and | Provide instructions to care for patient. Instruct participants to cover eyes. As needed, provide support for helping calm patient. |

|  |  |                                                                                                         |                                                                                                             |                                    |                                                                                                |
|--|--|---------------------------------------------------------------------------------------------------------|-------------------------------------------------------------------------------------------------------------|------------------------------------|------------------------------------------------------------------------------------------------|
|  |  | <p>If participants give comfort, patient responds.</p> <p>If not, participant increasingly agitated</p> | <p>Cover patient eyes with eye patches.</p> <p>Make a plan for continued monitoring with flight surgeon</p> | <p>made a plan, scenario ends.</p> | <p>After patient is handled, request to call back in 10 minutes with further instructions.</p> |
|--|--|---------------------------------------------------------------------------------------------------------|-------------------------------------------------------------------------------------------------------------|------------------------------------|------------------------------------------------------------------------------------------------|
